# Supplementary material for: The synthesis and structure of a dianionic species with a bond between pentacoordinated tin atoms: bonding properties of the tin–tin bond
Source: Royal Society of Chemistry journal article supplement (doi:10.1039/c6dt03503e), 2016-01-01
Supplement: c6dt03503e1.pdf [file c6dt03503e1.pdf]

Supporting Information Materials  
for  
**Synthesis and Structure of a Dianionic Species with a Bond between Pentacoordinated  
Tin Atoms: Bonding Property of the Tin–Tin Bond**

Satoru Tsukada,<sup>a</sup> Nathan J. O'Brien,<sup>a</sup> Naokazu Kano,<sup>\*a</sup> Takayuki Kawashima,<sup>\*a</sup> Jing-Dong Guo<sup>b</sup> and Shigeru Nagase<sup>b</sup>

*<sup>a</sup>Department of Chemistry, Graduate School of Science, The University of Tokyo  
7-3-1 Hongo, Bunkyo-ku, Tokyo 113-0033, Japan*

*<sup>b</sup>Fukui Institute for Fundamental Chemistry, Kyoto University, Takano-Nishihiraki-cho,  
Sakyo-ku, Kyoto 606-8103, Japan.*

**Contents**

- S2 NMR spectra of distannate **7**
- S4 NMR spectra of chlorostannate **9**
- S6 Variable-temperature <sup>19</sup>F NMR spectra of distannate **7**
- S7 <sup>1</sup>H, <sup>19</sup>F and <sup>119</sup>Sn NMR spectra of the reaction of distannate **7** with 1M aqueous hydrochloric acid
- S9 Optimized structure of the dianion part of distannate **7**
- S10 Comparison of the X-ray crystal structure and the DFT calculated structure of the dianion part of distannate **7**
- S11 Cartesian coordinates of the dianion part of distannate **7**

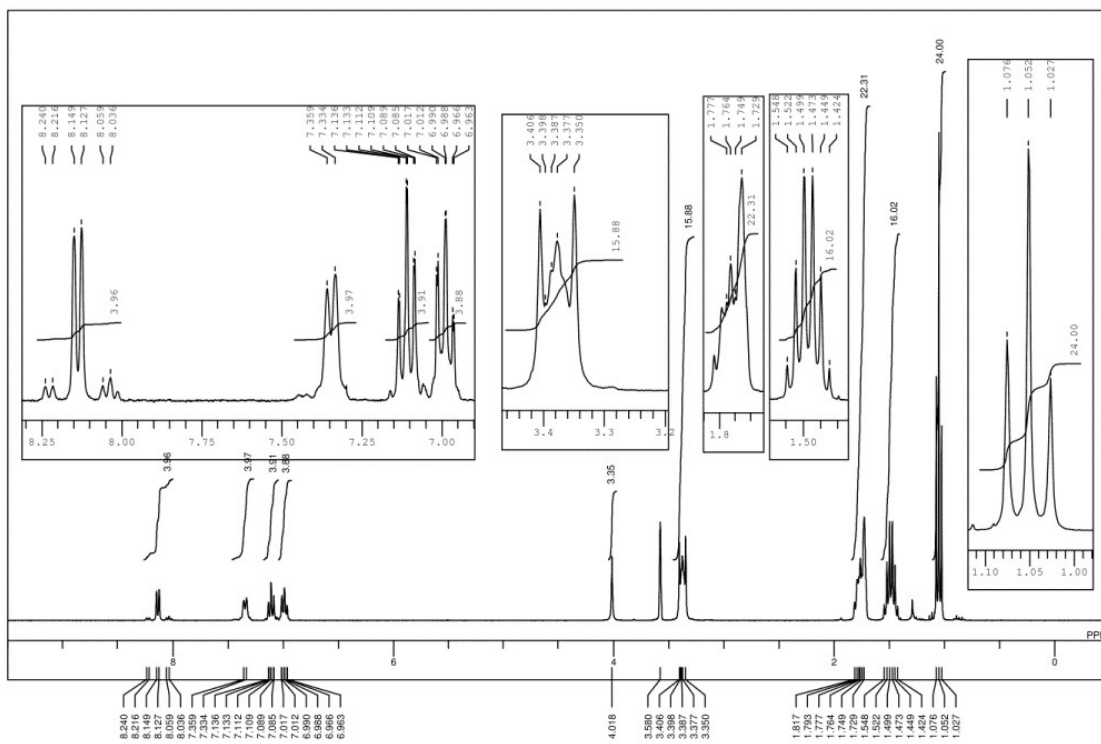

**Figure S1.**  $^1\text{H}$  NMR spectrum of distannate **7** in  $\text{THF-}d_8$ .

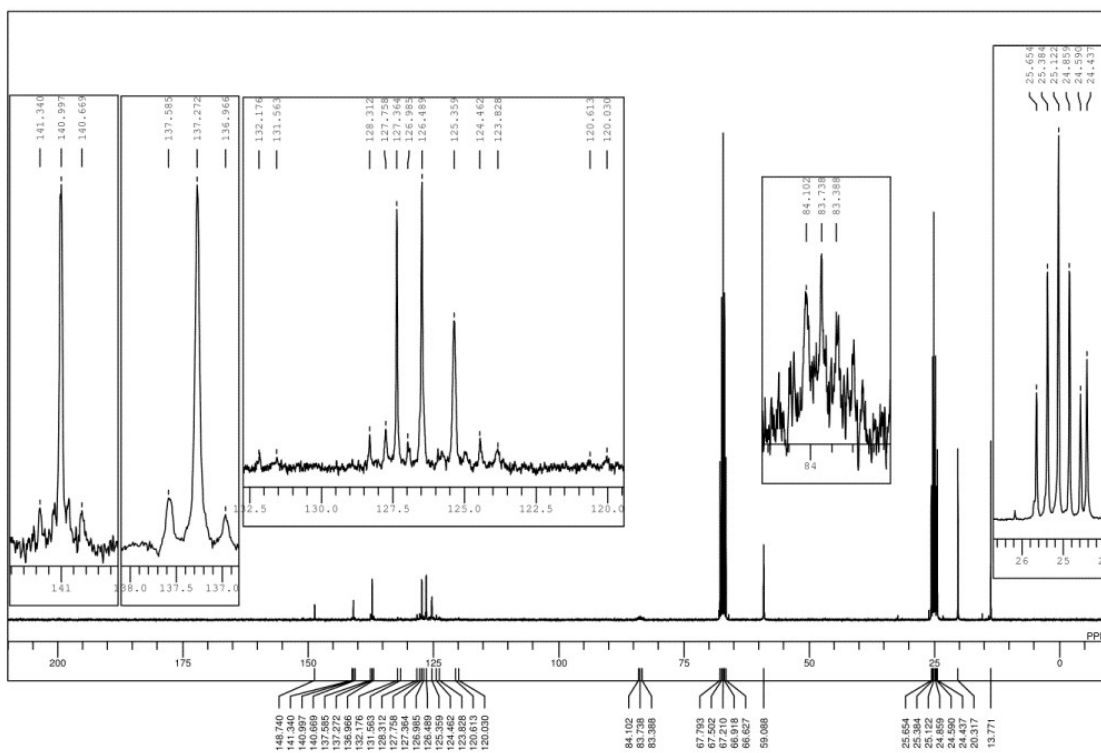

**Figure S2.**  $^{13}\text{C}$  NMR spectrum of distannate **7** in  $\text{THF-}d_8$ .

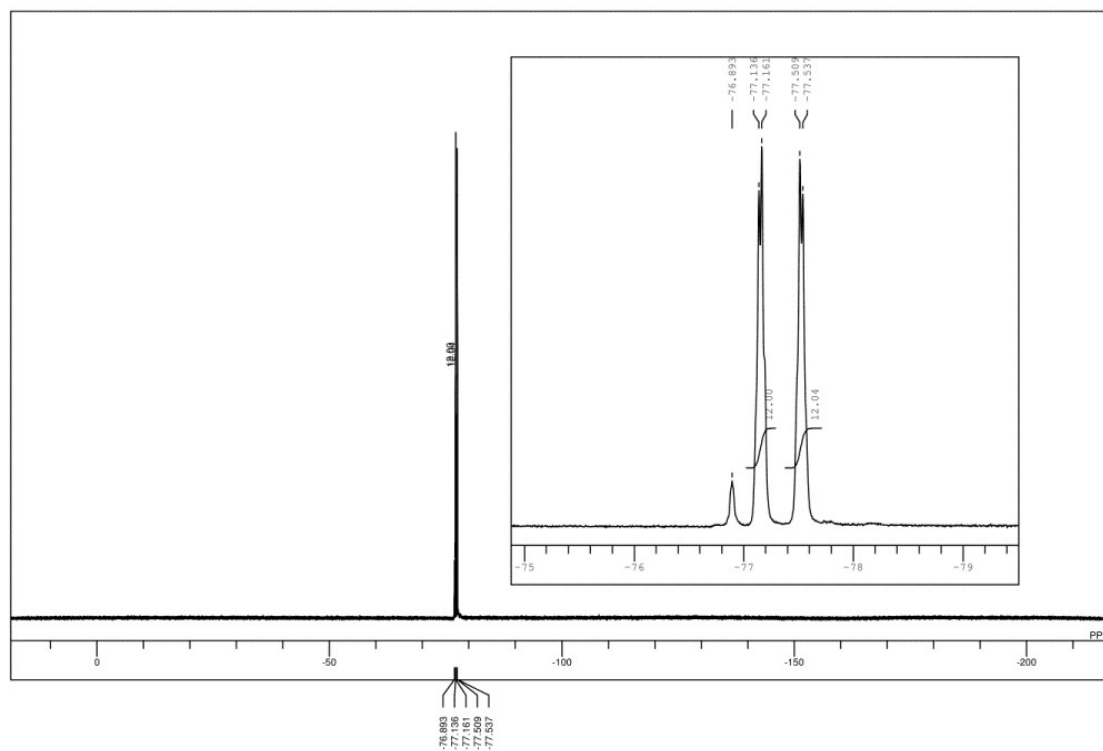

**Figure S3.**  $^{19}\text{F}$  NMR spectrum of distannate **7** in  $\text{THF-}d_8$ .

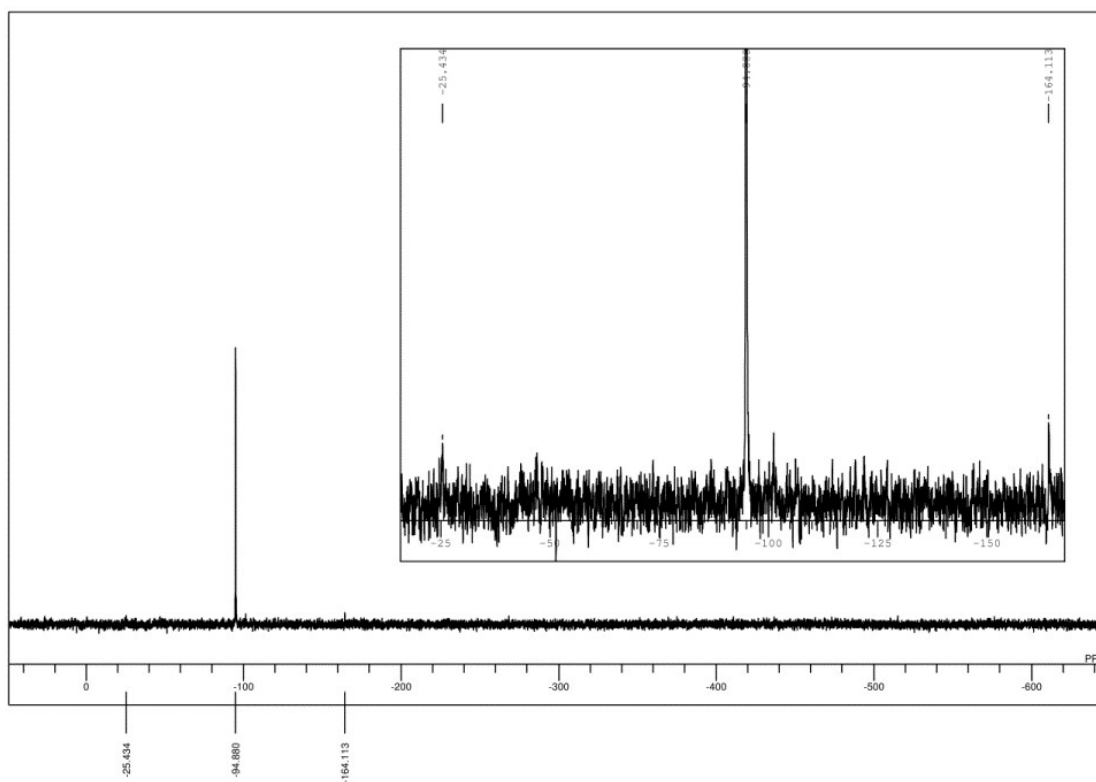

**Figure S4.**  $^{119}\text{Sn}$  NMR spectrum of distannate **7** in  $\text{THF-}d_8$ .

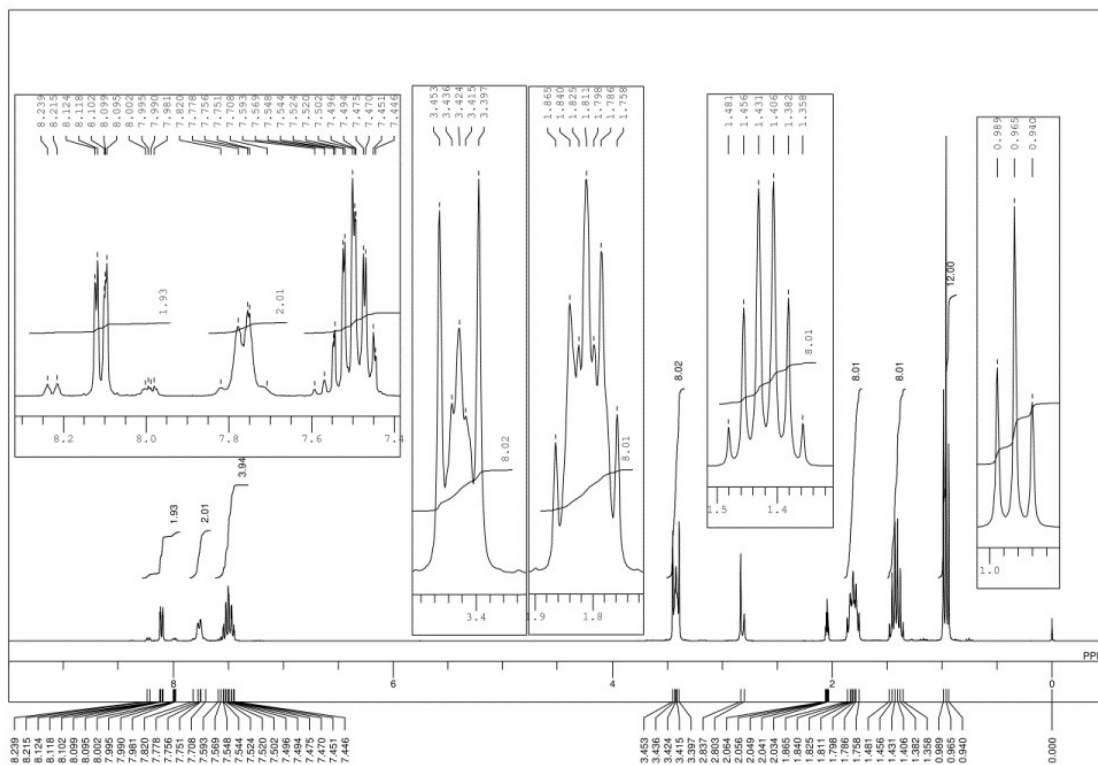

Figure S5.  $^1\text{H}$  NMR spectrum of chlorostannate **9** in acetone- $d_6$ .

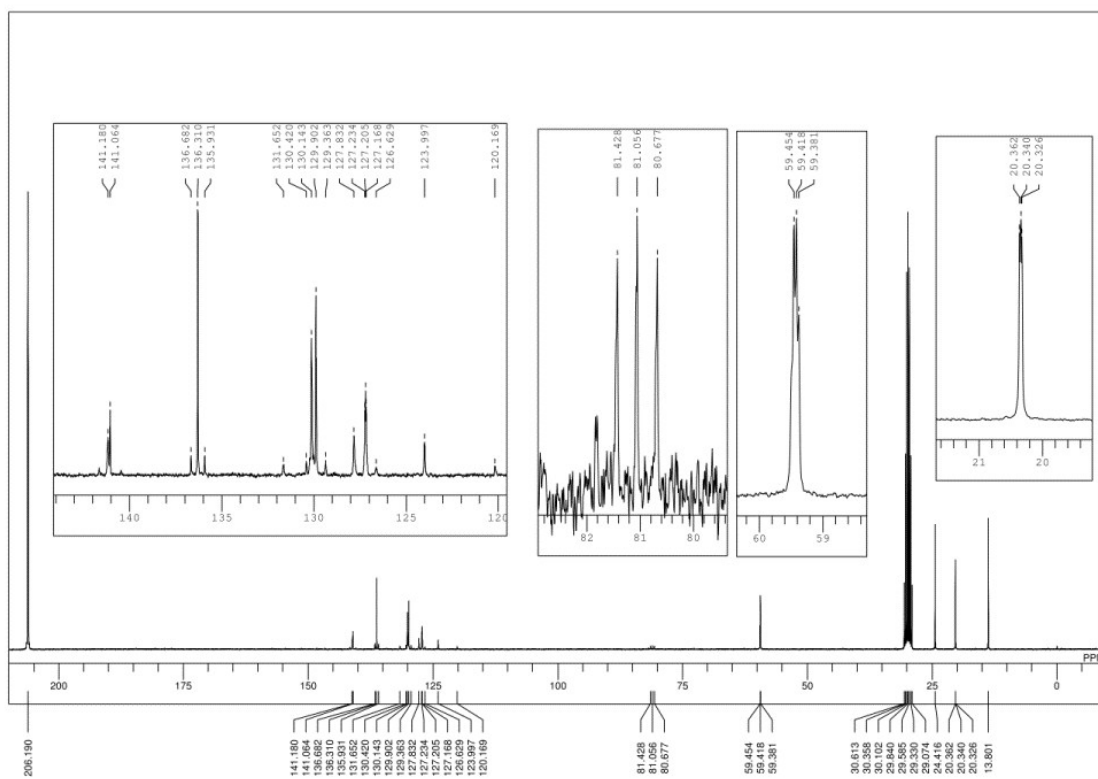

Figure S6.  $^{13}\text{C}$  NMR spectrum of chlorostannate **9** in acetone- $d_6$ .

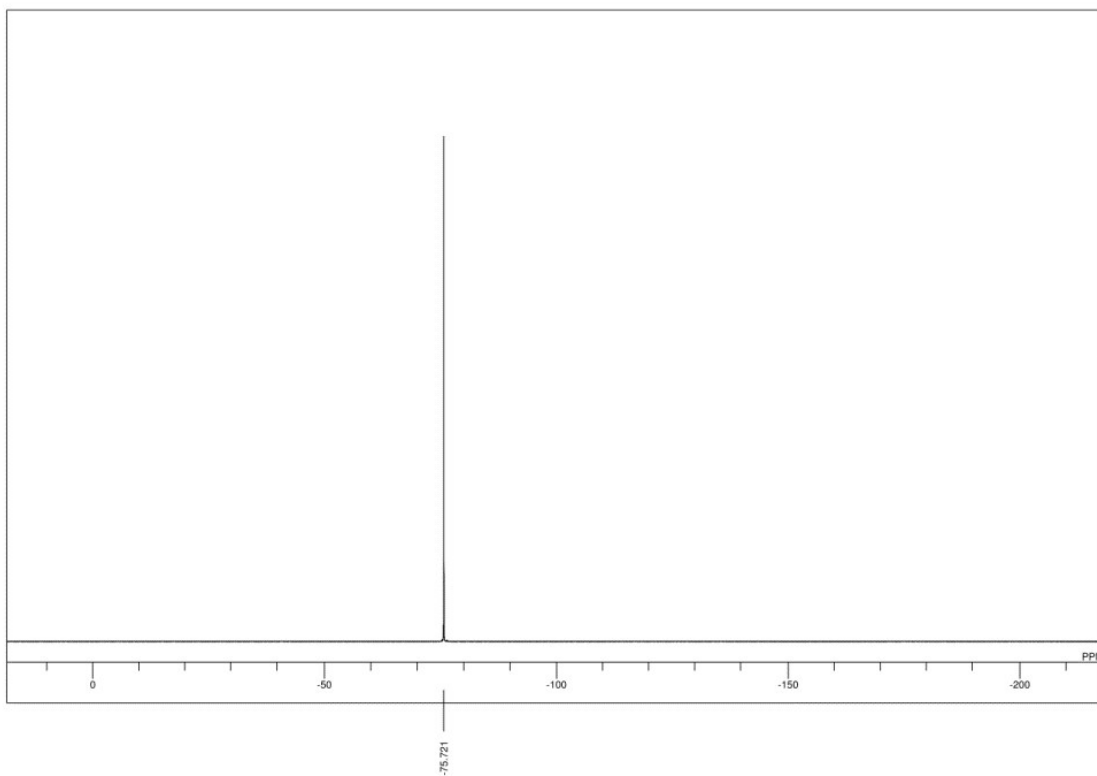

**Figure S7.**  $^{19}\text{F}$  NMR spectrum of chlorostannate **9** in acetone- $d_6$ .

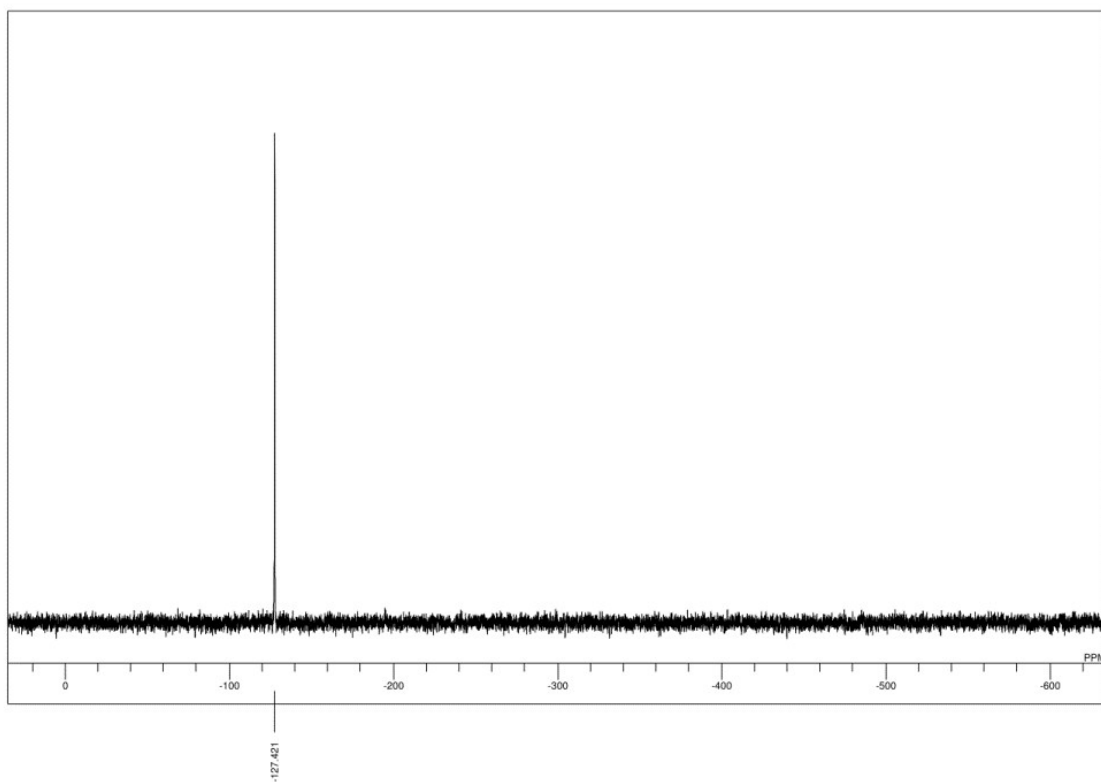

**Figure S8.**  $^{119}\text{Sn}$  NMR spectrum of chlorostannate **9** in acetone- $d_6$ .

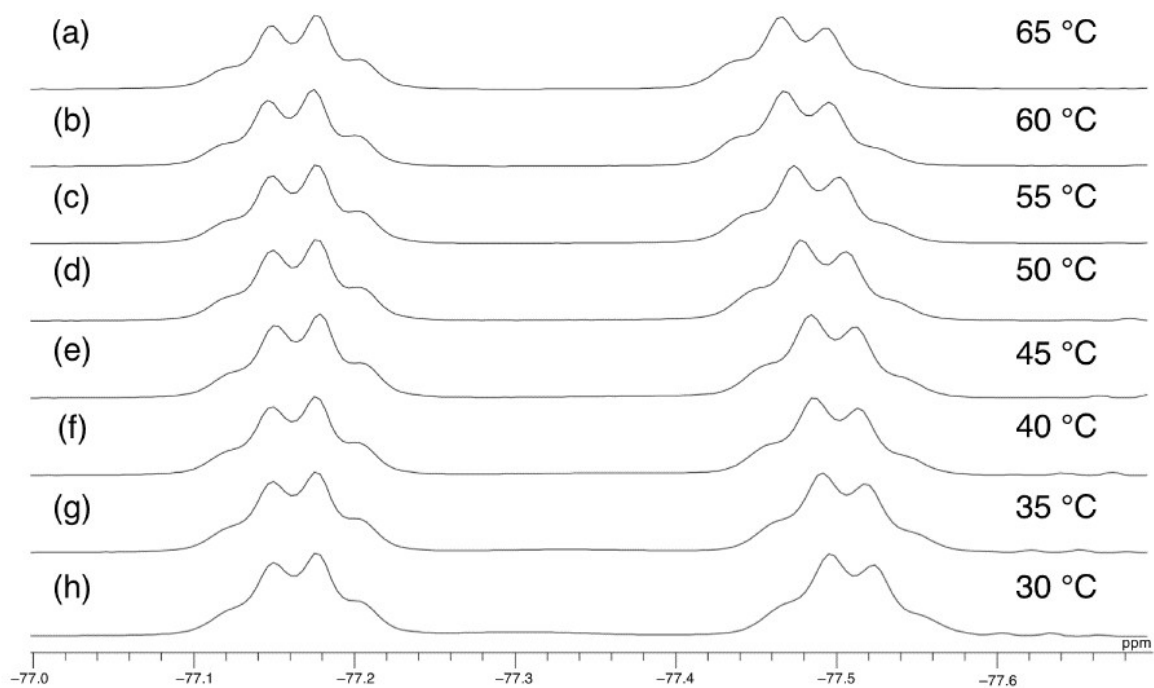

**Figure S9.** Variable-temperature  $^{19}\text{F}$  NMR spectra of distannate **7** in  $\text{THF-}d_8$  at (a) 65 °C, (b) 60 °C, (c) 55 °C, (d) 50 °C, (e) 45 °C, (f) 40 °C, (g) 35 °C, (h) 30 °C in the same  $\delta$  scale.

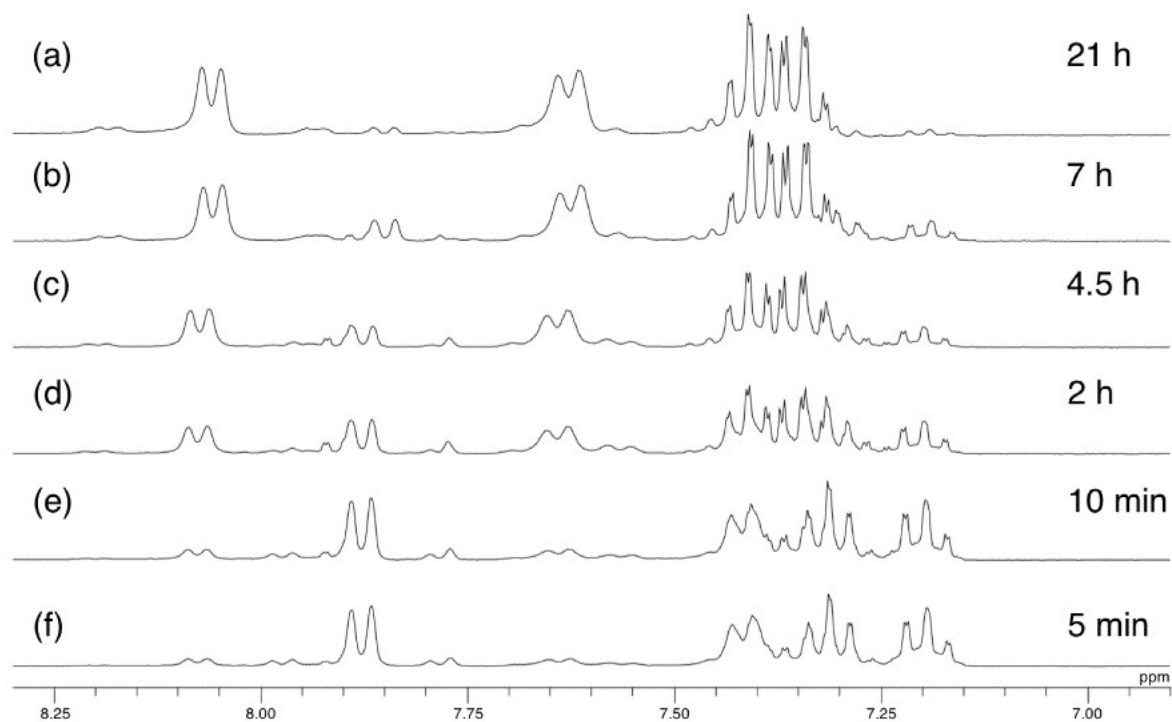

**Figure S10.**  $^1\text{H}$  NMR spectra of the reaction of distannate **7** in  $\text{THF-}d_8$  with 1M aqueous hydrochloric acid after (a) 21 h, (b) 7 h, (c) 4.5 h, (d) 2 h, (e) 10 min, (f) 5 min in the same  $\delta$  scale.

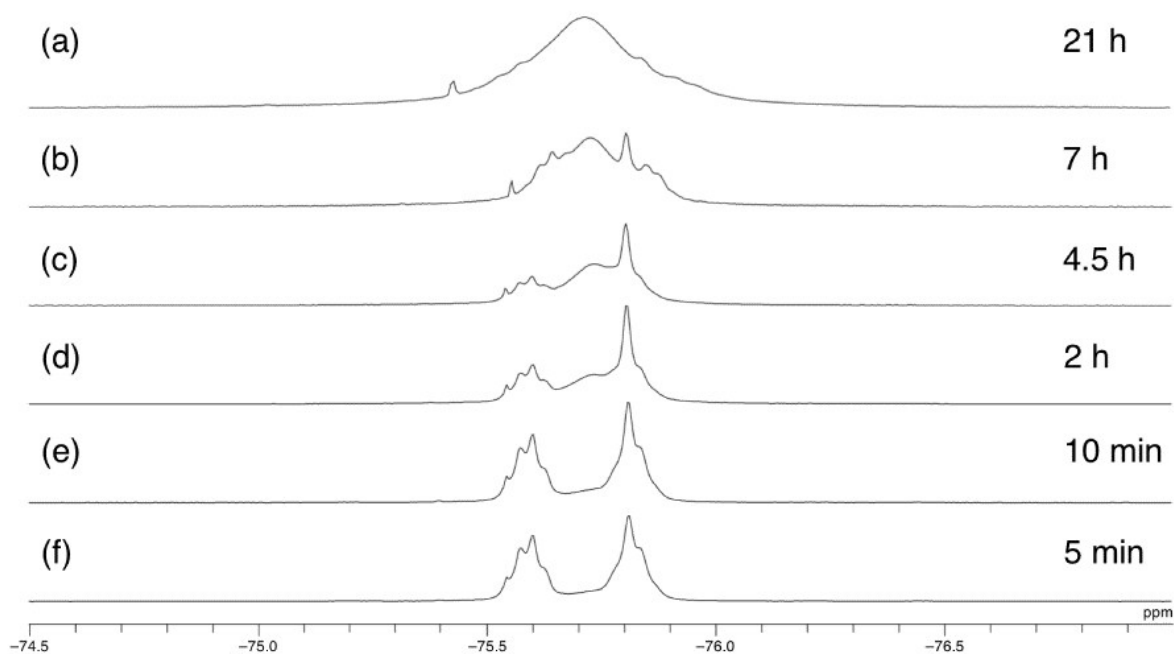

**Figure S11.**  $^{19}\text{F}$  NMR spectra of the reaction of distannate **7** in  $\text{THF-}d_8$  with 1M aqueous hydrochloric acid after (a) 21 h, (b) 7 h, (c) 4.5 h, (d) 2 h, (e) 10 min, (f) 5 min in the same  $\delta$  scale.

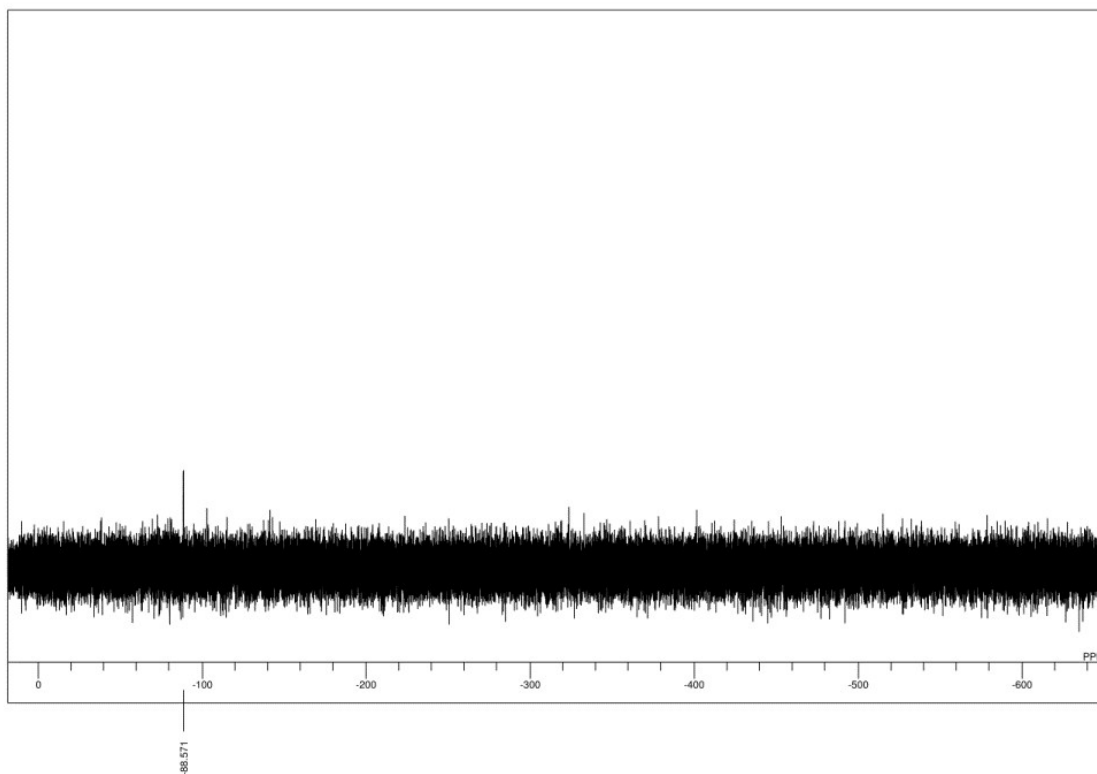

**Figure S12.**  $^{119}\text{Sn}$  NMR spectrum of the reaction of distannate **7** in  $\text{THF-}d_8$  with 1M aqueous hydrochloric acid after 15 minutes.



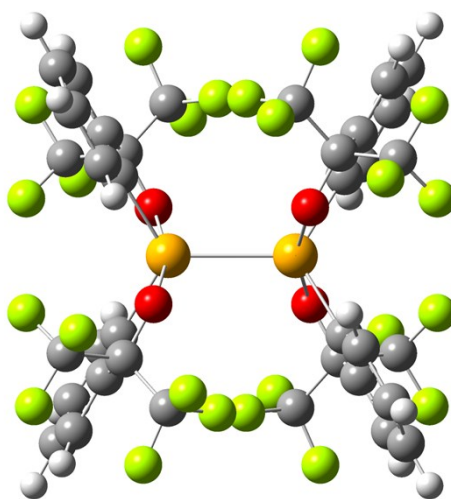

**Figure S13.** Optimized structure of the dianion part of distannate **7** (orange: tin; red: oxygen; gray: carbon; yellow-green: fluorine; white: hydrogen).

**Table S1.** Selected bond lengths (Å) and torsion angles (°) of the X-ray crystal structure and the DFT-calculated structure, atomic charges obtained by natural population analysis, hybridization of tin atoms to constitute the Sn–Sn bond obtained by the natural bond orbital analysis, and the Wiberg bond index of the dianion part of **7**.

|                     | <b>7</b> (X-ray) | <b>7</b> (calc.)   |
|---------------------|------------------|--------------------|
| Sn1–Sn1* (Å)        | 2.7522(14)       | 2.783              |
| Sn1–O1 (Å)          | 2.166(9)         | 2.157              |
| Sn1–O2 (Å)          | 2.162(9)         | 2.157              |
| Sn1–C1 (Å)          | 2.155(13)        | 2.151              |
| Sn1–C10 (Å)         | 2.104(11)        | 2.151              |
| O1–Sn1–Sn1*–O1* (°) | –122.8(4)        | 120.4              |
| O1–Sn1–Sn1*–O2* (°) | 58.6(4)          | –59.6              |
| $q_{\text{Sn1}}$    | –                | 1.581              |
| $q_{\text{Sn2}}$    | –                | 1.581              |
| $q_{\text{O1}}$     | –                | –0.865             |
| $q_{\text{O2}}$     | –                | –0.865             |
| $q_{\text{O3}}$     | –                | –0.865             |
| $q_{\text{O4}}$     | –                | –0.865             |
| $q_{\text{C1}}$     | –                | –0.430             |
| $q_{\text{C10}}$    | –                | –0.430             |
| Sn1 hybridization   | –                | sp <sup>2.35</sup> |
| Sn2 hybridization   | –                | sp <sup>2.35</sup> |
| Wiberg bond index   | –                | 0.843              |

**Table S2.** Cartesian coordinates in optimized geometry of the dianion part of **7**  
(Total energy: -16119.79727981 a.u.).

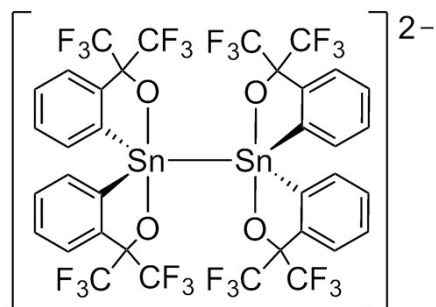

| Element | Coordinates (Angstroms) |           |           |
|---------|-------------------------|-----------|-----------|
|         | X                       | Y         | Z         |
| Sn      | 1.39133                 | -0.000076 | -0.000007 |
| Sn      | -1.391336               | 0.000072  | 0.000008  |
| C       | 2.45983                 | -1.741092 | 0.674059  |
| C       | 2.820435                | -2.016606 | 1.995285  |
| H       | 2.571422                | -1.29739  | 2.771865  |
| C       | 3.490215                | -3.19717  | 2.311873  |
| H       | 3.763111                | -3.412689 | 3.343879  |
| C       | 3.804633                | -4.106602 | 1.299515  |
| C       | 3.455708                | -3.836765 | -0.02349  |
| H       | 3.710814                | -4.551971 | -0.798215 |
| C       | 2.780077                | -2.651653 | -0.33558  |
| C       | 2.358041                | -2.252296 | -1.773628 |
| O       | 1.712463                | -1.060672 | -1.850624 |
| C       | 3.635696                | -2.13267  | -2.657038 |
| F       | 4.49389                 | -1.252828 | -2.107189 |
| F       | 4.324949                | -3.297416 | -2.816792 |
| F       | 3.362237                | -1.690524 | -3.900281 |
| C       | 1.391689                | -3.329731 | -2.348518 |
| F       | 0.315163                | -3.439642 | -1.559534 |
| F       | 1.937019                | -4.576464 | -2.448307 |
| F       | 0.958071                | -3.017209 | -3.585436 |
| C       | 2.460007                | 1.740827  | -0.674087 |
| C       | 2.82061                 | 2.016309  | -1.99532  |
| H       | 2.571499                | 1.297126  | -2.771899 |
| C       | 3.490514                | 3.196801  | -2.311917 |
| H       | 3.763408                | 3.412297  | -3.343929 |
| C       | 3.805055                | 4.106193  | -1.299561 |
| C       | 3.456133                | 3.836386  | 0.02345   |
| H       | 3.71133                 | 4.551561  | 0.798174  |

|   |           |           |           |
|---|-----------|-----------|-----------|
| C | 2.780382  | 2.651344  | 0.335549  |
| C | 2.358328  | 2.25203   | 1.773605  |
| O | 1.712606  | 1.060485  | 1.850607  |
| C | 1.392128  | 3.329587  | 2.34852   |
| F | 0.31561   | 3.439658  | 1.559549  |
| F | 0.958482  | 3.017107  | 3.58544   |
| F | 1.937631  | 4.576244  | 2.448319  |
| C | 3.635987  | 2.13224   | 2.656986  |
| F | 4.494065  | 1.252303  | 2.107109  |
| F | 4.325383  | 3.296902  | 2.816742  |
| F | 3.362501  | 1.690111  | 3.900229  |
| C | -2.459822 | 1.741091  | 0.674091  |
| C | -2.820413 | 2.016602  | 1.995321  |
| H | -2.571399 | 1.297381  | 2.771896  |
| C | -3.49018  | 3.197171  | 2.311919  |
| H | -3.763064 | 3.412689  | 3.343929  |
| C | -3.804598 | 4.10661   | 1.299568  |
| C | -3.455688 | 3.836776  | -0.023441 |
| H | -3.710793 | 4.551986  | -0.798162 |
| C | -2.78007  | 2.651658  | -0.335541 |
| C | -2.358054 | 2.252304  | -1.773596 |
| C | -3.635723 | 2.132693  | -2.656988 |
| F | -4.493877 | 1.252784  | -2.107182 |
| F | -4.325021 | 3.297424  | -2.816652 |
| F | -3.36227  | 1.690639  | -3.900265 |
| C | -1.3917   | 3.329732  | -2.348491 |
| F | -0.315106 | 3.439547  | -1.559585 |
| F | -0.958193 | 3.017267  | -3.585462 |
| F | -1.936983 | 4.576496  | -2.44816  |
| O | -1.712487 | 1.060675  | -1.850604 |
| C | -2.460026 | -1.740824 | -0.674067 |
| C | -2.820649 | -2.016299 | -1.995296 |
| H | -2.571548 | -1.297111 | -2.771874 |
| C | -3.49056  | -3.196787 | -2.311889 |
| H | -3.76347  | -3.412277 | -3.343898 |
| C | -3.805088 | -4.106184 | -1.299533 |
| C | -3.456145 | -3.836385 | 0.023474  |
| H | -3.711334 | -4.551563 | 0.798198  |
| C | -2.780388 | -2.651346 | 0.33557   |

|   |           |           |           |
|---|-----------|-----------|-----------|
| C | -2.358314 | -2.25204  | 1.773621  |
| O | -1.712592 | -1.060494 | 1.850621  |
| C | -3.635962 | -2.132257 | 2.657021  |
| F | -4.49404  | -1.252303 | 2.107171  |
| F | -4.325364 | -3.296916 | 2.816763  |
| F | -3.362456 | -1.690154 | 3.900269  |
| C | -1.392104 | -3.329598 | 2.348517  |
| F | -0.315584 | -3.439642 | 1.559544  |
| F | -0.958461 | -3.017137 | 3.585442  |
| F | -1.937593 | -4.576263 | 2.448292  |
| H | -4.324142 | -5.033159 | -1.538335 |
| H | 4.324103  | 5.03317   | -1.538365 |
| H | -4.323541 | 5.033646  | 1.538374  |
| H | 4.323587  | -5.033634 | 1.538312  |

---
